# Supplementary material
Source: publisher figshare collection journal article supplement (https://acs.figshare.com/ndownloader/files/4650892)
Supplement: Supplementary file 1 [file 4650892]

 
data_db10_0m 
 
_audit_creation_method            SHELXL-97 
_chemical_name_systematic 
; 
 ? 
; 
_chemical_name_common             ? 
_chemical_melting_point           ? 
_chemical_formula_moiety          ? 
_chemical_formula_sum 
 'C40 H60 N4 O128 Si64' 
_chemical_formula_weight          4442.68 
 
loop_ 
 _atom_type_symbol 
 _atom_type_description 
 _atom_type_scat_dispersion_real 
 _atom_type_scat_dispersion_imag 
 _atom_type_scat_source 
 'C'  'C'   0.0033   0.0016 
 'International Tables Vol C Tables 4.2.6.8 and 6.1.1.4' 
 'H'  'H'   0.0000   0.0000 
 'International Tables Vol C Tables 4.2.6.8 and 6.1.1.4' 
 'N'  'N'   0.0061   0.0033 
 'International Tables Vol C Tables 4.2.6.8 and 6.1.1.4' 
 'O'  'O'   0.0106   0.0060 
 'International Tables Vol C Tables 4.2.6.8 and 6.1.1.4' 
 'Si'  'Si'   0.0817   0.0704 
 'International Tables Vol C Tables 4.2.6.8 and 6.1.1.4' 
 
_symmetry_cell_setting            Tetragonal
_symmetry_space_group_name_H-M    I41/amd 
 
loop_ 
 _symmetry_equiv_pos_as_xyz 
 'x, y, z' 
 '-x+1/2, -y, z+1/2' 
 '-y+1/4, x+3/4, z+1/4' 
 'y+1/4, -x+1/4, z+3/4' 
 '-x+1/2, y, -z+1/2' 
 'x, -y, -z' 
 'y+1/4, x+3/4, -z+1/4' 
 '-y+1/4, -x+1/4, -z+3/4' 
 'x+1/2, y+1/2, z+1/2' 
 '-x+1, -y+1/2, z+1' 
 '-y+3/4, x+5/4, z+3/4' 
 'y+3/4, -x+3/4, z+5/4' 
 '-x+1, y+1/2, -z+1' 
 'x+1/2, -y+1/2, -z+1/2' 
 'y+3/4, x+5/4, -z+3/4' 
 '-y+3/4, -x+3/4, -z+5/4' 
 '-x, -y, -z' 
 'x-1/2, y, -z-1/2' 
 'y-1/4, -x-3/4, -z-1/4' 
 '-y-1/4, x-1/4, -z-3/4' 
 'x-1/2, -y, z-1/2' 
 '-x, y, z' 
 '-y-1/4, -x-3/4, z-1/4' 
 'y-1/4, x-1/4, z-3/4' 
 '-x+1/2, -y+1/2, -z+1/2' 
 'x, y+1/2, -z' 
 'y+1/4, -x-1/4, -z+1/4' 
 '-y+1/4, x+1/4, -z-1/4' 
 'x, -y+1/2, z' 
 '-x+1/2, y+1/2, z+1/2' 
 '-y+1/4, -x-1/4, z+1/4' 
 'y+1/4, x+1/4, z-1/4' 
 
_cell_length_a                    10.23160(10) 
_cell_length_b                    10.23160(10) 
_cell_length_c                    34.3642(6) 
_cell_angle_alpha                 90.00 
_cell_angle_beta                  90.00 
_cell_angle_gamma                 90.00 
_cell_volume                      3597.44(8) 
_cell_formula_units_Z             1 
_cell_measurement_temperature     296(2) 
_cell_measurement_reflns_used     9225 
_cell_measurement_theta_min       2.169
_cell_measurement_theta_max       39.391
 
_exptl_crystal_description        block 
_exptl_crystal_colour             colorless
_exptl_crystal_size_max           0.10 
_exptl_crystal_size_mid           0.10 
_exptl_crystal_size_min           0.08 
_exptl_crystal_density_meas       ? 
_exptl_crystal_density_diffrn     2.051 
_exptl_crystal_density_method     'not measured' 
_exptl_crystal_F_000              2248 
_exptl_absorpt_coefficient_mu     0.683 
_exptl_absorpt_correction_type    multi-scan 
_exptl_absorpt_correction_T_min   0.9348 
_exptl_absorpt_correction_T_max   0.9474 
_exptl_absorpt_process_details    SADABS 
 
_exptl_special_details 
; 
 ? 
; 
 
_diffrn_ambient_temperature       296(2) 
_diffrn_radiation_wavelength      0.71073 
_diffrn_radiation_type            MoK\a 
_diffrn_radiation_source          'fine-focus sealed tube' 
_diffrn_radiation_monochromator   graphite 
_diffrn_measurement_device_type   'Bruker Kappa APEXII CCD'
_diffrn_measurement_method        ' \f & \w scans' 
_diffrn_detector_area_resol_mean  ? 
_diffrn_standards_number          0 
_diffrn_standards_interval_count  ? 
_diffrn_standards_interval_time   ? 
_diffrn_standards_decay_%         ? 
_diffrn_reflns_number             37855 
_diffrn_reflns_av_R_equivalents   0.0422 
_diffrn_reflns_av_sigmaI/netI     0.0182 
_diffrn_reflns_limit_h_min        -18 
_diffrn_reflns_limit_h_max        16 
_diffrn_reflns_limit_k_min        -18 
_diffrn_reflns_limit_k_max        15 
_diffrn_reflns_limit_l_min        -62 
_diffrn_reflns_limit_l_max        62 
_diffrn_reflns_theta_min          2.08 
_diffrn_reflns_theta_max          40.22 
_reflns_number_total              3045 
_reflns_number_gt                 2594 
_reflns_threshold_expression      >2sigma(I) 
 
_computing_data_collection        'APEX2 (Bruker, 2006)'
_computing_cell_refinement        'SAINT (Bruker, 2006)' 
_computing_data_reduction         'SAINT (Bruker, 2006)' 
_computing_structure_solution     'SHELXS-97 (Sheldrick, 1990)' 
_computing_structure_refinement   'SHELXL-97 (Sheldrick, 1997)' 
_computing_molecular_graphics     ? 
_computing_publication_material   ? 
 
_refine_special_details 
; 
 Refinement of F^2^ against ALL reflections.  The weighted R-factor wR and 
 goodness of fit S are based on F^2^, conventional R-factors R are based 
 on F, with F set to zero for negative F^2^. The threshold expression of 
 F^2^ > 2sigma(F^2^) is used only for calculating R-factors(gt) etc. and is 
 not relevant to the choice of reflections for refinement.  R-factors based 
 on F^2^ are statistically about twice as large as those based on F, and R- 
 factors based on ALL data will be even larger. 
; 
 
_refine_ls_structure_factor_coef  Fsqd  
_refine_ls_matrix_type            full 
_refine_ls_weighting_scheme       calc  
_refine_ls_weighting_details 
 'calc w=1/[\s^2^(Fo^2^)+(0.0406P)^2^+1.6562P] where P=(Fo^2^+2Fc^2^)/3' 
_atom_sites_solution_primary      direct 
_atom_sites_solution_secondary    difmap 
_atom_sites_solution_hydrogens    geom 
_refine_ls_hydrogen_treatment     constr 
_refine_ls_extinction_method      none 
_refine_ls_extinction_coef        ? 
_refine_ls_number_reflns          3045 
_refine_ls_number_parameters      166 
_refine_ls_number_restraints      178 
_refine_ls_R_factor_all           0.0346 
_refine_ls_R_factor_gt            0.0271 
_refine_ls_wR_factor_ref          0.0740 
_refine_ls_wR_factor_gt           0.0703 
_refine_ls_goodness_of_fit_ref    1.047 
_refine_ls_restrained_S_all       1.031 
_refine_ls_shift/su_max           0.000 
_refine_ls_shift/su_mean          0.000 
 
loop_ 
 _atom_site_label 
 _atom_site_type_symbol 
 _atom_site_fract_x 
 _atom_site_fract_y 
 _atom_site_fract_z 
 _atom_site_U_iso_or_equiv 
 _atom_site_adp_type 
 _atom_site_occupancy 
 _atom_site_symmetry_multiplicity 
 _atom_site_calc_flag 
 _atom_site_refinement_flags 
 _atom_site_disorder_assembly 
 _atom_site_disorder_group 
Si1 Si 0.28573(2) 0.2500 0.118256(7) 0.00917(4) Uani 1 2 d S . 1 
Si2 Si 0.28165(3) 0.5000 0.0000 0.01058(5) Uani 1 2 d S . 1 
Si3 Si 0.15338(2) 0.2500 0.034650(7) 0.00879(4) Uani 1 2 d S . 1 
Si4 Si 0.15104(3) 0.2500 0.195505(7) 0.01008(5) Uani 1 2 d S . 1 
O1 O 0.0000 0.2500 0.20671(3) 0.0273(3) Uani 1 4 d S . 1 
O2 O 0.21929(7) 0.12200(7) 0.213041(18) 0.02624(13) Uani 1 1 d . . 1 
O3 O 0.22849(8) 0.2500 0.07528(2) 0.01921(15) Uani 1 2 d S . 1 
O4 O 0.16752(7) 0.2500 0.149086(19) 0.01558(13) Uani 1 2 d S . 1 
O5 O 0.0000 0.2500 0.04234(4) 0.0217(2) Uani 1 4 d S . 1 
O6 O 0.19133(6) 0.37745(6) 0.010069(17) 0.02095(11) Uani 1 1 d . . 1 
O7 O 0.37206(8) 0.37794(8) 0.1250 0.02625(18) Uani 1 2 d S . 1 
N1 N 0.0336(11) 0.5150(12) 0.0871(3) 0.092(3) Uani 0.13 1 d PDU A -3 
C1 C 0.0157(10) 0.6372(9) 0.1069(3) 0.0848(16) Uani 0.13 1 d PDU A -3 
C2 C -0.1249(10) 0.6835(10) 0.1018(4) 0.087(2) Uani 0.13 1 d PDU A -3 
H2A H -0.1848 0.6197 0.1126 0.104 Uiso 0.13 1 calc PR A -3 
H2B H -0.1447 0.6939 0.0743 0.104 Uiso 0.13 1 calc PR A -3 
C3 C 0.1060(11) 0.7388(9) 0.0881(3) 0.0841(19) Uani 0.13 1 d PDU A -3 
H3A H 0.0805 0.7525 0.0612 0.101 Uiso 0.25 2 calc SPR A -3 
H3B H 0.1953 0.7073 0.0884 0.101 Uiso 0.13 1 calc PR A -3 
C4 C 0.0456(14) 0.6163(10) 0.1501(3) 0.085(2) Uani 0.13 1 d PDU A -3 
H4A H -0.0151 0.5535 0.1611 0.103 Uiso 0.13 1 calc PR A -3 
H4B H 0.1336 0.5826 0.1532 0.103 Uiso 0.13 1 calc PR A -3 
C5 C -0.1403(10) 0.8157(10) 0.1231(3) 0.0875(18) Uani 0.13 1 d PDU A -3 
H5 H -0.2301 0.8478 0.1204 0.105 Uiso 0.13 1 calc PR A -3 
C6 C 0.0971(11) 0.8687(10) 0.1106(3) 0.0835(18) Uani 0.13 1 d PDU A -3 
H6 H 0.1573 0.9332 0.0995 0.100 Uiso 0.13 1 calc PR A -3 
C7 C 0.0324(9) 0.7475(11) 0.1710(3) 0.0859(17) Uani 0.25 2 d SPDU A -3 
H7 H 0.0515 0.7364 0.1988 0.103 Uiso 0.13 1 calc PR A -3 
C8 C -0.0439(10) 0.9166(11) 0.1073(4) 0.086(2) Uani 0.13 1 d PDU A -3 
H8A H -0.0534 0.9975 0.1218 0.103 Uiso 0.13 1 calc PR A -3 
H8B H -0.0640 0.9346 0.0803 0.103 Uiso 0.13 1 calc PR A -3 
C9 C 0.1284(13) 0.8453(14) 0.1531(3) 0.085(2) Uani 0.13 1 d PDU A -3 
H9A H 0.1236 0.9274 0.1672 0.102 Uiso 0.13 1 calc PR A -3 
H9B H 0.2168 0.8119 0.1555 0.102 Uiso 0.13 1 calc PR A -3 
C10 C -0.1070(11) 0.7950(15) 0.1658(3) 0.087(2) Uani 0.13 1 d PDU A -3 
H10A H -0.1184 0.8766 0.1798 0.105 Uiso 0.13 1 calc PR A -3 
H10B H -0.1666 0.7314 0.1769 0.105 Uiso 0.13 1 calc PR A -3 
 
loop_ 
 _atom_site_aniso_label 
 _atom_site_aniso_U_11 
 _atom_site_aniso_U_22 
 _atom_site_aniso_U_33 
 _atom_site_aniso_U_23 
 _atom_site_aniso_U_13 
 _atom_site_aniso_U_12 
Si1 0.00833(9) 0.01101(10) 0.00818(8) 0.000 -0.00078(7) 0.000 
Si2 0.01051(10) 0.01034(10) 0.01090(9) 0.00190(7) 0.000 0.000 
Si3 0.00831(9) 0.00896(9) 0.00909(8) 0.000 -0.00100(7) 0.000 
Si4 0.00826(9) 0.01381(10) 0.00816(8) 0.000 -0.00029(7) 0.000 
O1 0.0081(4) 0.0597(9) 0.0141(4) 0.000 0.000 0.000 
O2 0.0345(3) 0.0246(3) 0.0197(2) 0.0092(2) 0.0035(2) 0.0131(2) 
O3 0.0189(3) 0.0296(4) 0.0091(2) 0.000 -0.0041(2) 0.000 
O4 0.0129(3) 0.0249(3) 0.0089(2) 0.000 0.0016(2) 0.000 
O5 0.0078(4) 0.0289(6) 0.0285(5) 0.000 0.000 0.000 
O6 0.0253(3) 0.0159(2) 0.0216(2) 0.00784(18) -0.0056(2) -0.0086(2) 
O7 0.0249(2) 0.0249(2) 0.0290(4) -0.00254(19) -0.00254(19) -0.0154(3) 
N1 0.092(4) 0.088(4) 0.096(4) -0.006(3) 0.000(3) -0.001(3) 
C1 0.086(3) 0.083(2) 0.085(2) -0.004(2) 0.002(2) 0.000(2) 
C2 0.084(3) 0.089(3) 0.088(3) -0.004(3) -0.002(3) -0.001(3) 
C3 0.085(3) 0.084(3) 0.083(3) -0.001(3) 0.010(3) 0.000(3) 
C4 0.088(3) 0.084(3) 0.085(3) 0.002(3) 0.001(3) 0.002(3) 
C5 0.085(3) 0.091(3) 0.086(3) -0.001(2) 0.000(3) 0.004(3) 
C6 0.085(3) 0.082(3) 0.083(3) 0.001(3) 0.005(2) 0.000(2) 
C7 0.087(3) 0.090(3) 0.081(3) 0.001(3) -0.004(2) 0.001(3) 
C8 0.087(3) 0.086(3) 0.084(3) 0.002(3) 0.002(3) 0.001(3) 
C9 0.086(3) 0.086(3) 0.084(3) 0.001(3) -0.002(3) 0.000(3) 
C10 0.087(3) 0.091(3) 0.083(3) 0.001(3) 0.000(3) 0.003(3) 
 
_geom_special_details 
; 
 All esds (except the esd in the dihedral angle between two l.s. planes) 
 are estimated using the full covariance matrix.  The cell esds are taken 
 into account individually in the estimation of esds in distances, angles 
 and torsion angles; correlations between esds in cell parameters are only 
 used when they are defined by crystal symmetry.  An approximate (isotropic) 
 treatment of cell esds is used for estimating esds involving l.s. planes. 
; 
 
loop_ 
 _geom_bond_atom_site_label_1 
 _geom_bond_atom_site_label_2 
 _geom_bond_distance 
 _geom_bond_site_symmetry_2 
 _geom_bond_publ_flag 
Si1 O3 1.5887(7) . ? 
Si1 O7 1.5961(3) . ? 
Si1 O7 1.5961(3) 20_656 ? 
Si1 O4 1.6078(7) . ? 
Si2 O6 1.5956(6) 6_565 ? 
Si2 O6 1.5956(6) . ? 
Si2 O2 1.6020(6) 27_565 ? 
Si2 O2 1.6020(6) 32 ? 
Si3 O5 1.5914(3) . ? 
Si3 O3 1.5938(7) . ? 
Si3 O6 1.6015(6) . ? 
Si3 O6 1.6015(6) 29 ? 
Si4 O1 1.5926(4) . ? 
Si4 O2 1.6018(6) 29 ? 
Si4 O2 1.6018(6) . ? 
Si4 O4 1.6041(7) . ? 
O1 Si4 1.5926(4) 10_454 ? 
O2 Si2 1.6020(6) 20_656 ? 
O5 Si3 1.5914(3) 10_454 ? 
O7 Si1 1.5961(3) 27_565 ? 
N1 C1 1.435(13) . ? 
C1 C3 1.533(8) . ? 
C1 C4 1.533(8) . ? 
C1 C2 1.525(9) . ? 
C2 C5 1.545(9) . ? 
C2 H2A 0.9700 . ? 
C2 H2B 0.9700 . ? 
C3 C6 1.539(9) . ? 
C3 H3A 0.9700 . ? 
C3 H3B 0.9700 . ? 
C4 C7 1.528(9) . ? 
C4 H4A 0.9700 . ? 
C4 H4B 0.9700 . ? 
C5 C10 1.523(9) . ? 
C5 C8 1.527(9) . ? 
C5 H5 0.9800 . ? 
C6 C9 1.516(9) . ? 
C6 C8 1.528(9) . ? 
C6 H6 0.9800 . ? 
C7 C10 1.517(9) . ? 
C7 C9 1.531(9) . ? 
C7 H7 0.9800 . ? 
C8 H8A 0.9700 . ? 
C8 H8B 0.9700 . ? 
C9 H9A 0.9700 . ? 
C9 H9B 0.9700 . ? 
C10 H10A 0.9700 . ? 
C10 H10B 0.9700 . ? 
 
loop_ 
 _geom_angle_atom_site_label_1 
 _geom_angle_atom_site_label_2 
 _geom_angle_atom_site_label_3 
 _geom_angle 
 _geom_angle_site_symmetry_1 
 _geom_angle_site_symmetry_3 
 _geom_angle_publ_flag 
O3 Si1 O7 109.81(2) . . ? 
O3 Si1 O7 109.81(2) . 20_656 ? 
O7 Si1 O7 110.20(8) . 20_656 ? 
O3 Si1 O4 109.59(4) . . ? 
O7 Si1 O4 108.70(3) . . ? 
O7 Si1 O4 108.70(3) 20_656 . ? 
O6 Si2 O6 109.21(5) 6_565 . ? 
O6 Si2 O2 110.61(4) 6_565 27_565 ? 
O6 Si2 O2 108.45(3) . 27_565 ? 
O6 Si2 O2 108.45(3) 6_565 32 ? 
O6 Si2 O2 110.61(4) . 32 ? 
O2 Si2 O2 109.51(5) 27_565 32 ? 
O5 Si3 O3 109.27(6) . . ? 
O5 Si3 O6 109.07(4) . . ? 
O3 Si3 O6 110.19(3) . . ? 
O5 Si3 O6 109.07(4) . 29 ? 
O3 Si3 O6 110.19(3) . 29 ? 
O6 Si3 O6 109.03(5) . 29 ? 
O1 Si4 O2 109.40(3) . 29 ? 
O1 Si4 O2 109.40(3) . . ? 
O2 Si4 O2 109.69(6) 29 . ? 
O1 Si4 O4 110.02(5) . . ? 
O2 Si4 O4 109.17(3) 29 . ? 
O2 Si4 O4 109.17(3) . . ? 
Si4 O1 Si4 152.03(8) 10_454 . ? 
Si4 O2 Si2 148.82(5) . 20_656 ? 
Si1 O3 Si3 172.80(6) . . ? 
Si4 O4 Si1 137.25(5) . . ? 
Si3 O5 Si3 160.88(9) 10_454 . ? 
Si2 O6 Si3 153.47(4) . . ? 
Si1 O7 Si1 158.25(8) 27_565 . ? 
N1 C1 C3 108.4(6) . . ? 
N1 C1 C4 108.2(6) . . ? 
C3 C1 C4 112.5(9) . . ? 
N1 C1 C2 109.7(6) . . ? 
C3 C1 C2 108.0(8) . . ? 
C4 C1 C2 110.0(9) . . ? 
C1 C2 C5 108.3(8) . . ? 
C1 C2 H2A 110.0 . . ? 
C5 C2 H2A 110.0 . . ? 
C1 C2 H2B 110.0 . . ? 
C5 C2 H2B 110.0 . . ? 
H2A C2 H2B 108.4 . . ? 
C1 C3 C6 109.9(7) . . ? 
C1 C3 H3A 109.7 . . ? 
C6 C3 H3A 109.7 . . ? 
C1 C3 H3B 109.7 . . ? 
C6 C3 H3B 109.7 . . ? 
H3A C3 H3B 108.2 . . ? 
C7 C4 C1 108.4(7) . . ? 
C7 C4 H4A 110.0 . . ? 
C1 C4 H4A 110.0 . . ? 
C7 C4 H4B 110.0 . . ? 
C1 C4 H4B 110.0 . . ? 
H4A C4 H4B 108.4 . . ? 
C10 C5 C8 106.9(9) . . ? 
C10 C5 C2 108.2(9) . . ? 
C8 C5 C2 111.0(9) . . ? 
C10 C5 H5 110.2 . . ? 
C8 C5 H5 110.2 . . ? 
C2 C5 H5 110.2 . . ? 
C9 C6 C8 108.7(9) . . ? 
C9 C6 C3 109.6(8) . . ? 
C8 C6 C3 107.2(9) . . ? 
C9 C6 H6 110.4 . . ? 
C8 C6 H6 110.4 . . ? 
C3 C6 H6 110.4 . . ? 
C10 C7 C9 110.3(9) . . ? 
C10 C7 C4 108.0(8) . . ? 
C9 C7 C4 109.2(8) . . ? 
C10 C7 H7 109.8 . . ? 
C9 C7 H7 109.8 . . ? 
C4 C7 H7 109.8 . . ? 
C5 C8 C6 111.5(8) . . ? 
C5 C8 H8A 109.3 . . ? 
C6 C8 H8A 109.3 . . ? 
C5 C8 H8B 109.3 . . ? 
C6 C8 H8B 109.3 . . ? 
H8A C8 H8B 108.0 . . ? 
C6 C9 C7 110.8(8) . . ? 
C6 C9 H9A 109.5 . . ? 
C7 C9 H9A 109.5 . . ? 
C6 C9 H9B 109.5 . . ? 
C7 C9 H9B 109.5 . . ? 
H9A C9 H9B 108.1 . . ? 
C7 C10 C5 111.6(8) . . ? 
C7 C10 H10A 109.3 . . ? 
C5 C10 H10A 109.3 . . ? 
C7 C10 H10B 109.3 . . ? 
C5 C10 H10B 109.3 . . ? 
H10A C10 H10B 108.0 . . ? 
 
_diffrn_measured_fraction_theta_max    0.994 
_diffrn_reflns_theta_full              40.22 
_diffrn_measured_fraction_theta_full   0.994 
_refine_diff_density_max    0.528 
_refine_diff_density_min   -0.432 
_refine_diff_density_rms    0.081 
